# Supplementary material for: Validation of real-world actigraphy to capture post-stroke motor recovery
Source: bioRxiv or medRxiv preprint supplement (doi:10.1101/2024.11.03.24316674), 2024-11-04
Supplement: Supplementary file [file media-1.pdf]

# Supplemental Appendix

Supplemental Figure i.

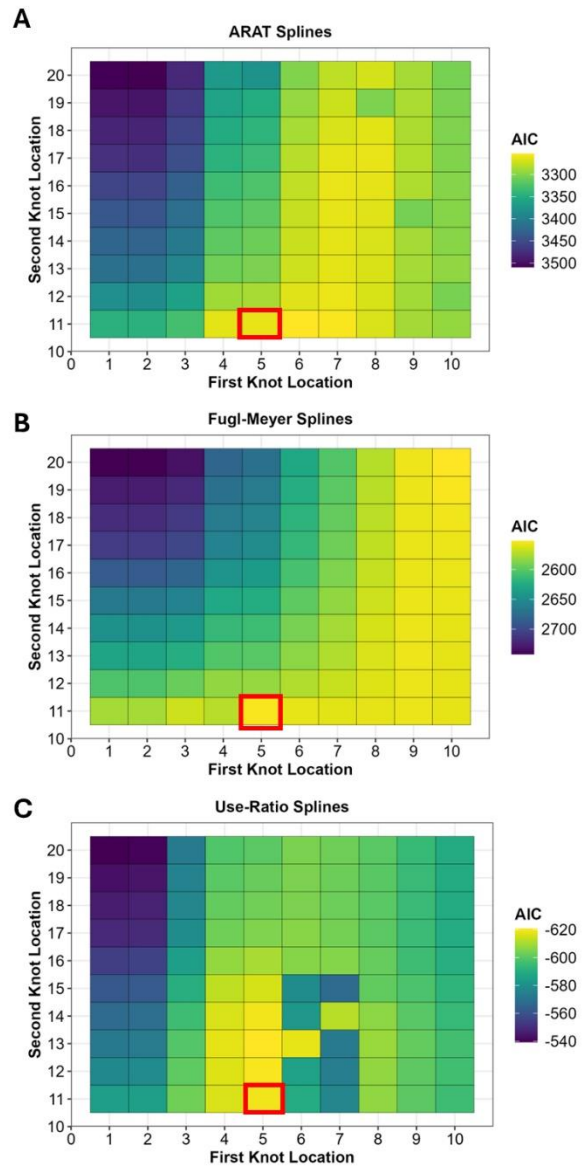

Supplemental Figure ii.

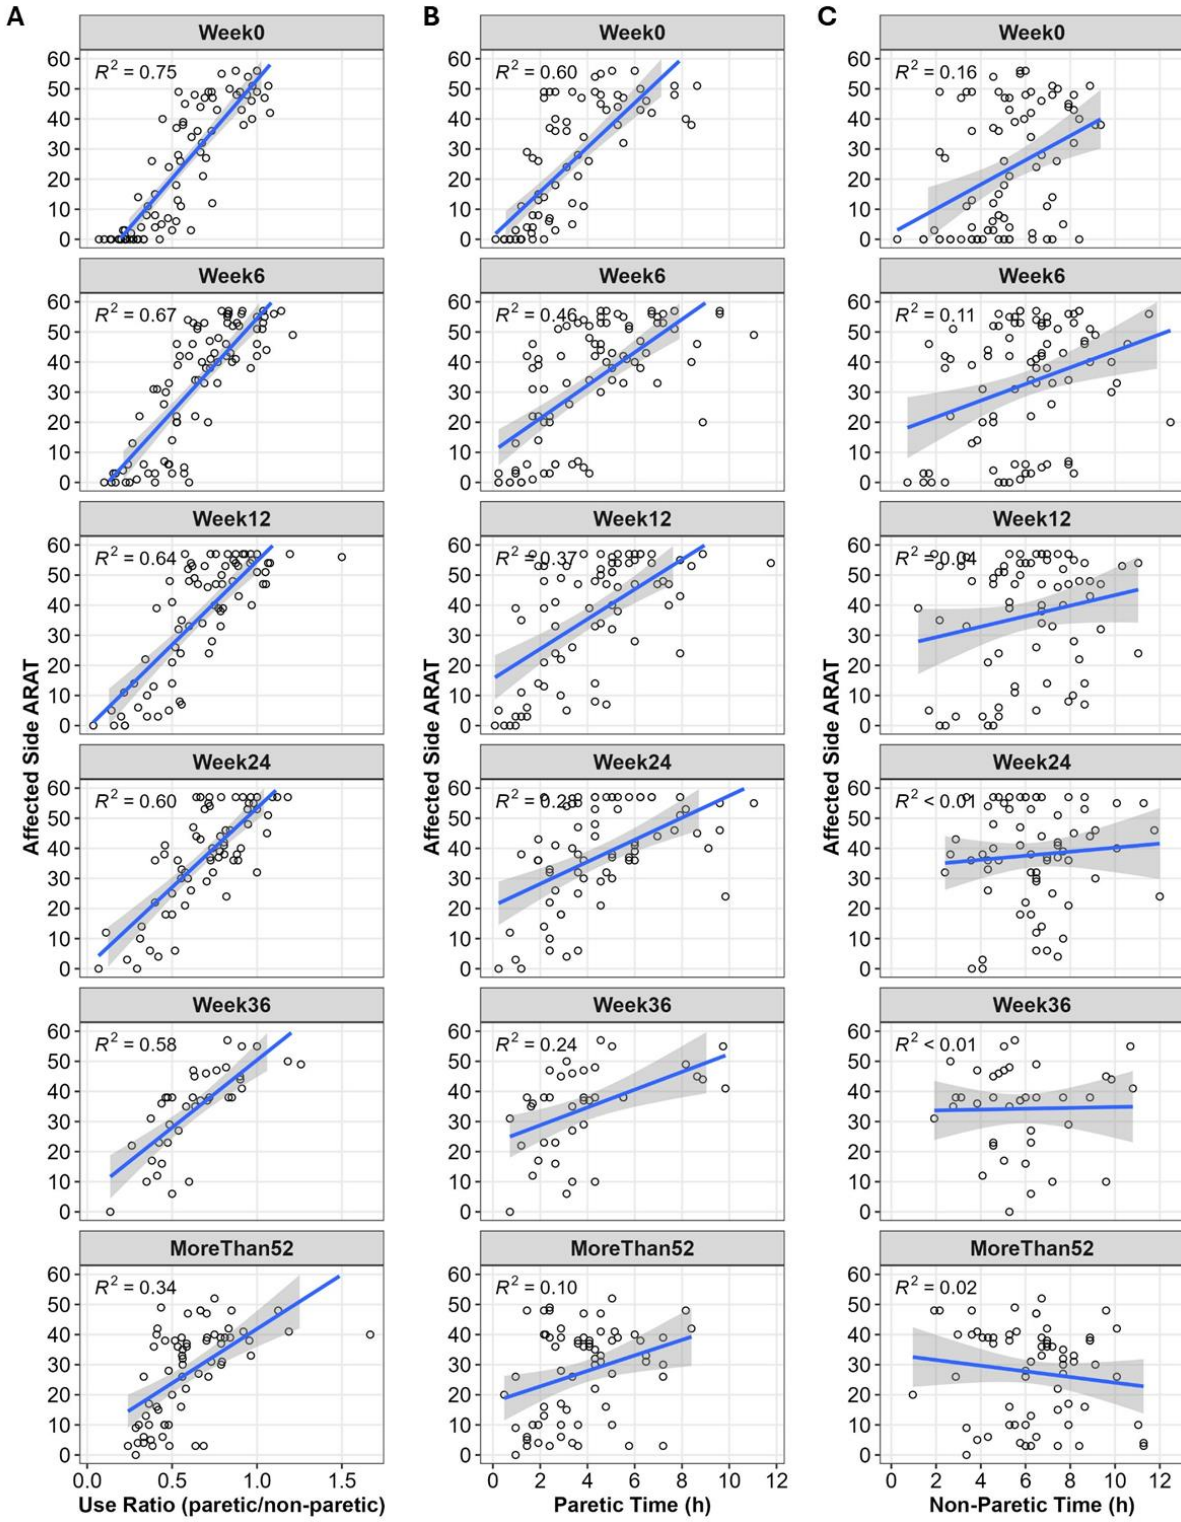

Supplemental Figure iii.

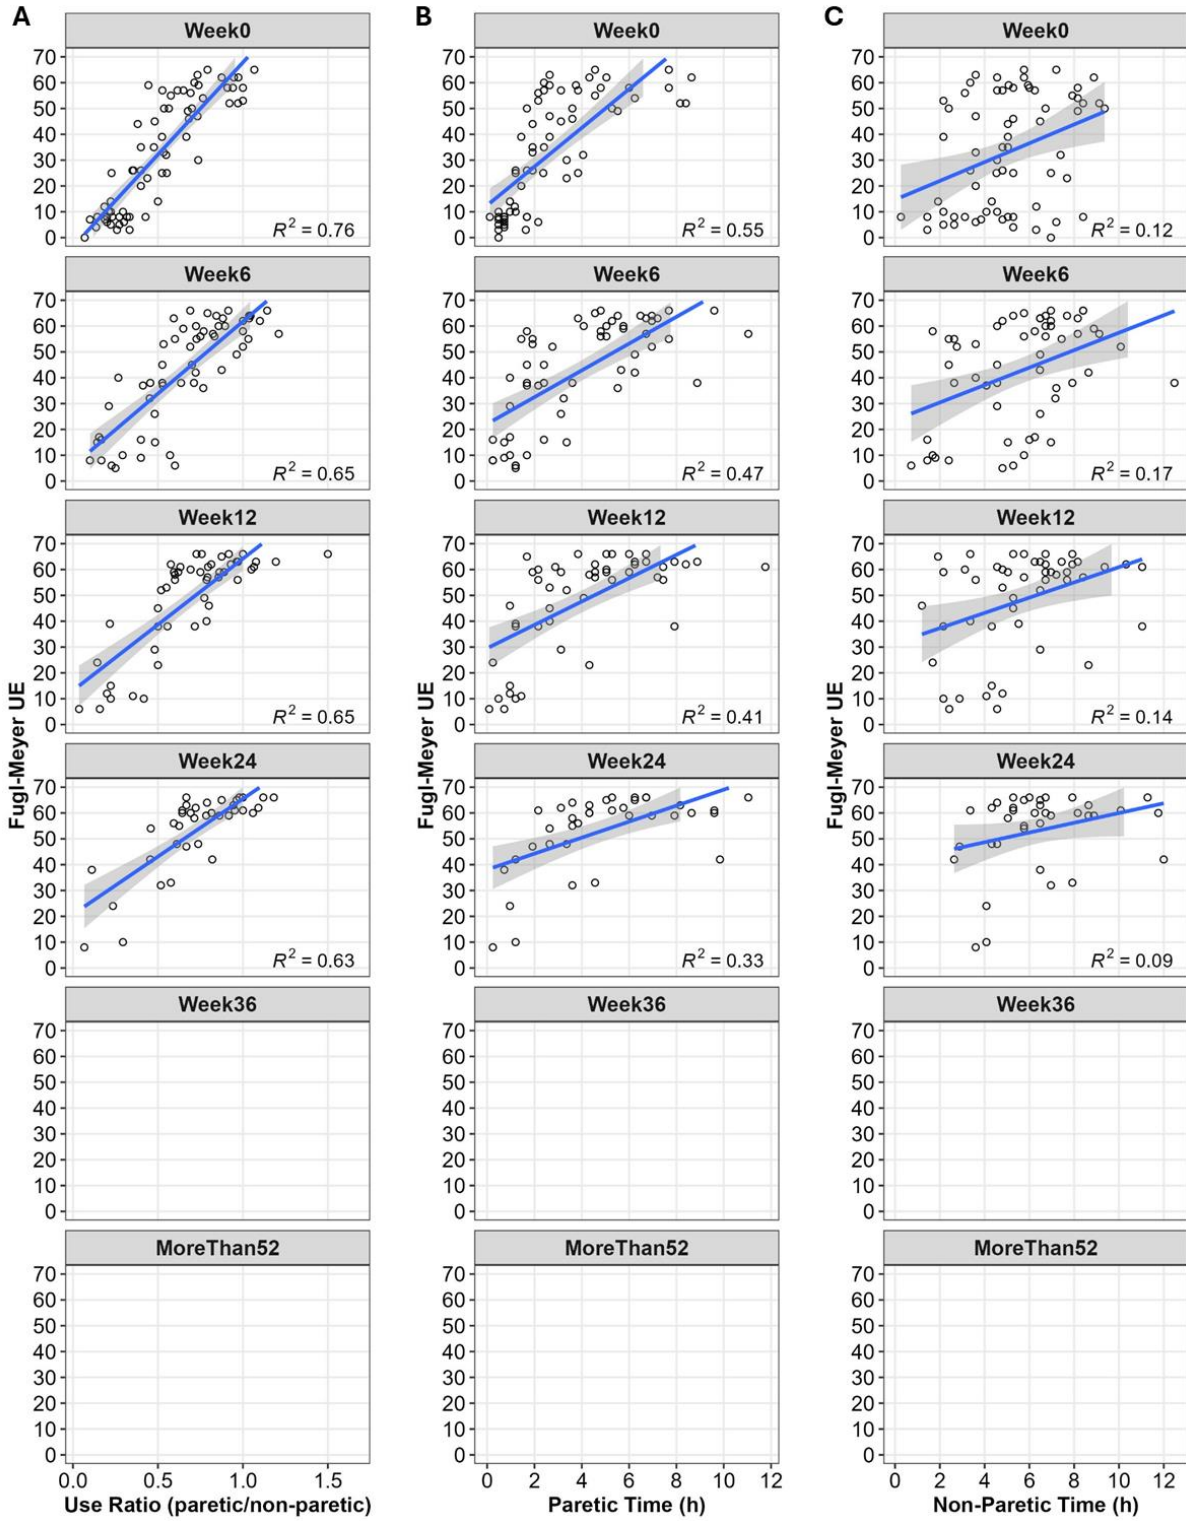

**Supplemental Table i.** Model fit comparisons for the ARAT

| Model                 | n par     | AIC           | BIC           | logLik         | deviance      | $\chi^2$ Decrease | df       | P( $\chi^2$ )    |
|-----------------------|-----------|---------------|---------------|----------------|---------------|-------------------|----------|------------------|
| Intercept Only        | 3         | 3777.1        | 3789.8        | -1885.6        | 3771.1        |                   |          |                  |
| Linear Time           | 6         | 3537.5        | 3562.7        | -1762.8        | 3525.5        | 245.634           | 3        | <0.001           |
| Inverse Square        | 6         | 3379.9        | 3405.1        | -1684.0        | 3367.9        | 157.594           | 0        | na               |
| Inverse Cubic         | 6         | 3479.8        | 3505.1        | -1733.9        | 3467.8        | (increased)       | 0        | na               |
| 3-Param. Exponential  | 9         | 3283.5        | 3325.5        | -1631.8        | 3263.5        | 204.3             | 3        | <0.001           |
| Quadratic Time        | 10        | 3373.1        | 3415.1        | -1676.5        | 3353.1        | (increased)       | 1        | na               |
| Cubic Time            | 11        | 3338.1        | 3384.3        | -1658.0        | 3316.1        | 37.016            | 1        | <0.001           |
| <b>2-Knot Spline†</b> | <b>15</b> | <b>3261.9</b> | <b>3325.0</b> | <b>-1615.9</b> | <b>3231.9</b> | <b>84.198</b>     | <b>4</b> | <b>&lt;0.001</b> |

Note, all models included random slopes for all time parameters. The 2-knot spline shown refers to overall best fitting spline with knots at 5- and 11-weeks. AIC = Akaike's information criterion; BIC = Bayesian Information Criterion; loglik = log(Likelihood); df = degrees of freedom; p( $\chi^2$ ) = p-value from Wald's test for the change in deviance compared to previous model. † = best fitting model based on AIC.

**Supplemental Table ii.** Model fit comparisons for the FM-UE

| Model                 | n par     | AIC           | BIC           | logLik         | deviance      | $\chi^2$ Decrease | df       | P( $\chi^2$ )   |
|-----------------------|-----------|---------------|---------------|----------------|---------------|-------------------|----------|-----------------|
| Intercept Only        | 3         | 2969.9        | 2981.8        | -1481.9        | 2963.9        |                   |          |                 |
| Linear Time           | 6         | 2772.2        | 2796          | -1380.1        | 2760.2        | 203.696           | 3        | < 2.2e-16       |
| Inverse Square        | 6         | 2675.1        | 2698.9        | -1331.5        | 2663.1        | 97.12             | 0        | na              |
| Inverse Cubic         | 6         | 2759.2        | 2783          | -1373.6        | 2747.2        | (increased)       | 0        | na              |
| 3-Param. Exponential  | 6*        | 2578.9        | 2606.8        | -1282.5        | 2564.9        | 182.2             | 0        | na              |
| Quadratic Time        | 10        | 2619.8        | 2659.5        | -1299.9        | 2599.8        | (increased)       | 4        | na              |
| Cubic Time            | 11        | 2602.3        | 2646          | -1290.1        | 2580.3        | 19.535            | 1        | 9.88E-06        |
| <b>2-Knot Spline†</b> | <b>15</b> | <b>2554.1</b> | <b>2613.7</b> | <b>-1262.1</b> | <b>2524.1</b> | <b>56.15</b>      | <b>4</b> | <b>1.87E-11</b> |

Note, all models included random slopes for all time parameters. The 2-knot spline shown refers to overall best fitting spline with knots at 5- and 11-weeks. AIC = Akaike's information criterion; BIC = Bayesian Information Criterion; loglik = log(Likelihood); df = degrees of freedom; p( $\chi^2$ ) = p-value from Wald's test for the change in deviance compared to previous model. \* = model failed to converge with random-effect of the rate parameter, so was refit with only a fixed rate parameter. † = best fitting model based on AIC.

**Supplemental Table iii.** Model fit comparisons for the Use Ratio

| Model                 | n par     | AIC            | BIC         | logLik        | deviance       | $\chi^2$ Decrease | df       | P( $\chi^2$ )   |
|-----------------------|-----------|----------------|-------------|---------------|----------------|-------------------|----------|-----------------|
| Intercept Only        | 3         | -459.45        | -446.82     | 232.73        | -465.45        |                   |          |                 |
| 3-Param. Exponential  | 4*        | -548.3         | -527.2      | 279.10        | -558.28        | 92.8              | 1        | < 2.2e-16       |
| Linear Time           | 6         | -533.04        | -507.76     | 272.52        | -545.04        | (increased)       | 2        | na              |
| Inverse Square        | 6         | -608.13        | -582.85     | 310.06        | -620.13        | 75.0868           | 0        |                 |
| Inverse Cubic         | 6         | -587.68        | -562.4      | 299.84        | -599.68        | (increased)       | 0        |                 |
| Quadratic Time        | 10        | -588.96        | -546.83     | 304.48        | -608.96        | 9.2819            | 4        | 0.054427        |
| Cubic Time            | 11        | -597.73        | -551.39     | 309.87        | -619.73        | 10.7704           | 1        | 1.03E-03        |
| <b>2-Knot Spline†</b> | <b>15</b> | <b>-619.19</b> | <b>-556</b> | <b>324.60</b> | <b>-649.19</b> | <b>29.4616</b>    | <b>4</b> | <b>6.30E-06</b> |

Note, all models included random slopes for all time parameters. The 2-knot spline shown refers to overall best fitting spline with knots at 5- and 11-weeks. AIC = Akaike's information criterion; BIC = Bayesian Information Criterion; loglik = log(Likelihood); df = degrees of freedom; p( $\chi^2$ ) = p-value from Wald's test for the change in deviance compared to the previous model. \* = model failed to converge with random-effects of the rate and change parameters, so was refit with only a random effect on the asymptote. † = best fitting model based on AIC.

**Supplemental Table iv.** Details of the best fitting spline model for the ARAT.

|            |            |               |                 |                 |
|------------|------------|---------------|-----------------|-----------------|
| <b>AIC</b> | <b>BIC</b> | <b>logLik</b> | <b>deviance</b> | <b>df.resid</b> |
| 3261.9     | 3325.0     | -1615.9       | 3231.9          | 481             |

Scaled residuals:

|         |         |        |        |        |
|---------|---------|--------|--------|--------|
| Min     | 1Q      | Median | 3Q     | Max    |
| -3.4678 | -0.3429 | 0.0152 | 0.2958 | 3.0871 |

Random effects:

| Groups    | Name            | Variance | Std.Dev. | Corr            |
|-----------|-----------------|----------|----------|-----------------|
| SubIDName | (Intercept)     | 553.605  | 23.529   |                 |
|           | WeeksPostStroke | 13.226   | 3.637    | -0.56           |
|           | knot05          | 11.695   | 3.420    | 0.43 -0.93      |
|           | knot11          | 1.645    | 1.283    | 0.43 -0.47 0.13 |
|           | Residual        | 7.419    | 2.724    |                 |

Number of obs: 496, groups: SubIDName, 98

Fixed effects:

|                 | Estimate | Std. Error | df      | t value | Pr(> t )     |
|-----------------|----------|------------|---------|---------|--------------|
| (Intercept)     | 12.7206  | 2.8857     | 85.6438 | 4.408   | 3.01e-05 *** |
| WeeksPostStroke | 3.1852   | 0.5159     | 68.0570 | 6.174   | 4.19e-08 *** |
| knot05          | -1.8513  | 0.5306     | 67.2708 | -3.489  | 0.00086 ***  |
| knot11          | -1.2056  | 0.1836     | 81.1598 | -6.566  | 4.54e-09 *** |

---

Signif. codes: 0 '\*\*\*' 0.001 '\*\*' 0.01 '\*' 0.05 '.' 0.1 ' ' 1

**Supplemental Table v.** Details of the best fitting spline model for the FM-UE.

|            |            |               |                 |                 |
|------------|------------|---------------|-----------------|-----------------|
| <b>AIC</b> | <b>BIC</b> | <b>logLik</b> | <b>deviance</b> | <b>df.resid</b> |
| 2554.1     | 2613.7     | -1262.1       | 2524.1          | 378             |

**Scaled residuals:**

|            |           |               |           |            |
|------------|-----------|---------------|-----------|------------|
| <b>Min</b> | <b>1Q</b> | <b>Median</b> | <b>3Q</b> | <b>Max</b> |
| -3.1768    | -0.3573   | 0.0209        | 0.3821    | 3.3408     |

**Random effects:**

| <b>Groups</b> | <b>Name</b>     | <b>Variance</b> | <b>Std.Dev.</b> | <b>Corr</b>      |
|---------------|-----------------|-----------------|-----------------|------------------|
| SubIDName     | (Intercept)     | 622.746         | 24.955          |                  |
|               | WeeksPostStroke | 5.707           | 2.389           | -0.54            |
|               | knot05          | 6.314           | 2.513           | 0.22 -0.73       |
|               | knot11          | 3.833           | 1.958           | 0.30 -0.25 -0.47 |
|               | Residual        | 7.847           | 2.801           |                  |

Number of obs: 393, groups: SubIDName, 68

**Fixed effects:**

|                 | <b>Estimate</b> | <b>Std. Error</b> | <b>df</b> | <b>t value</b> | <b>Pr(&gt; t )</b> |
|-----------------|-----------------|-------------------|-----------|----------------|--------------------|
| (Intercept)     | 24.7254         | 3.2574            | 66.1576   | 7.591          | 1.41e-10 ***       |
| WeeksPostStroke | 2.7116          | 0.4118            | 57.3172   | 6.585          | 1.52e-08 ***       |
| knot05          | -1.4258         | 0.4737            | 52.5736   | -3.010         | 0.004008 **        |
| knot11          | -1.1319         | 0.2939            | 57.4449   | -3.851         | 0.000298 ***       |

---

Signif. codes: 0 '\*\*\*' 0.001 '\*\*' 0.01 '\*' 0.05 '.' 0.1 ' ' 1



**Supplemental Table vi.** Details of the best fitting spline model for the Use Ratio.

|            |            |               |                 |                 |
|------------|------------|---------------|-----------------|-----------------|
| <b>AIC</b> | <b>BIC</b> | <b>logLik</b> | <b>deviance</b> | <b>df.resid</b> |
| -619.2     | -556.0     | 324.6         | -649.2          | 484             |

**Scaled residuals:**

|            |           |               |           |            |
|------------|-----------|---------------|-----------|------------|
| <b>Min</b> | <b>1Q</b> | <b>Median</b> | <b>3Q</b> | <b>Max</b> |
| -3.6433    | -0.4583   | -0.0067       | 0.3897    | 4.0693     |

**Random effects:**

| <b>Groups</b> | <b>Name</b>     | <b>Variance</b> | <b>Std.Dev.</b> | <b>Corr</b>      |
|---------------|-----------------|-----------------|-----------------|------------------|
| SubIDName     | (Intercept)     | 0.0808610       | 0.28436         |                  |
|               | WeeksPostStroke | 0.0019462       | 0.04412         | -0.43            |
|               | knot05          | 0.0024237       | 0.04923         | 0.31 -0.90       |
|               | knot11          | 0.0006486       | 0.02547         | -0.02 0.18 -0.59 |
|               | Residual        | 0.0054398       | 0.07375         |                  |

Number of obs: 499, groups: SubIDName, 98

**Fixed effects:**

|                 | <b>Estimate</b> | <b>Std. Error</b> | <b>df</b> | <b>t value</b> | <b>Pr(&gt; t )</b> |     |
|-----------------|-----------------|-------------------|-----------|----------------|--------------------|-----|
| (Intercept)     | 0.395352        | 0.042263          | 74.221063 | 9.355          | 3.47e-14           | *** |
| WeeksPostStroke | 0.045277        | 0.008431          | 68.480103 | 5.370          | 1.01e-06           | *** |
| knot05          | -0.038468       | 0.009880          | 72.821508 | -3.893         | 0.000217           | *** |
| knot11          | -0.005270       | 0.004160          | 84.278495 | -1.267         | 0.208719           |     |

---

Signif. codes: 0 '\*\*\*' 0.001 '\*\*' 0.01 '\*' 0.05 '.' 0.1 ' ' 1
